# Supplementary material for: Gardenia jasminoides extract and its constituent, genipin, inhibit activation of CD3/CD28 co-stimulated CD4+ T cells via ORAI1 channel
Source: PubMed Central journal article supplement — Korean J Physiol Pharmacol. 2020 Jul 1;24(4):363–72. doi: 10.4196/kjpp.2020.24.4.363 (PMC7317176; doi:10.4196/kjpp.2020.24.4.363), 2020-07-01
Supplement: KJPP-24-363_Supple.pdf [file KJPP-24-363_Supple.pdf]

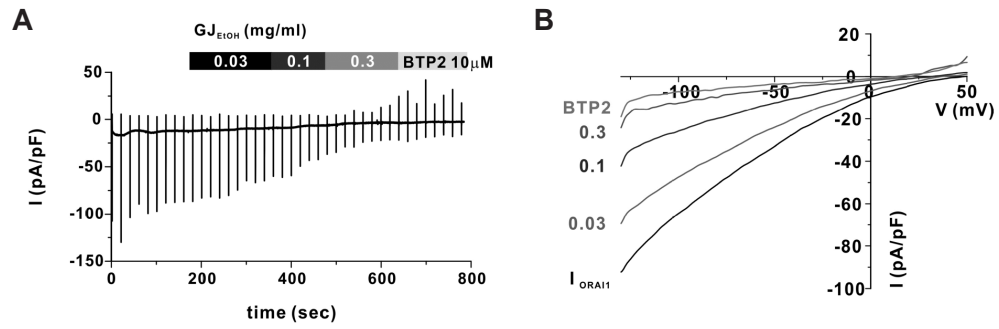

**Supplementary Fig. 1. Inhibitory effects of 0.03 mg/ml 70% ethanolic extract of *Gardenia jasminoides* ( $GJ_{EtOH}$ ) on ORA11 current ( $I_{ORA11}$ ).** (A) Representative chart trace recordings of  $I_{ORA11}$  and inhibition of  $I_{ORA11}$  activity by 0.03 mg/ml, 0.1 mg/ml and 0.3 mg/ml  $GJ_{EtOH}$  and 10  $\mu$ M BTP2. (B) Related current (I)-voltage (V) relationship graph at steady-state  $I_{ORA11}$ .

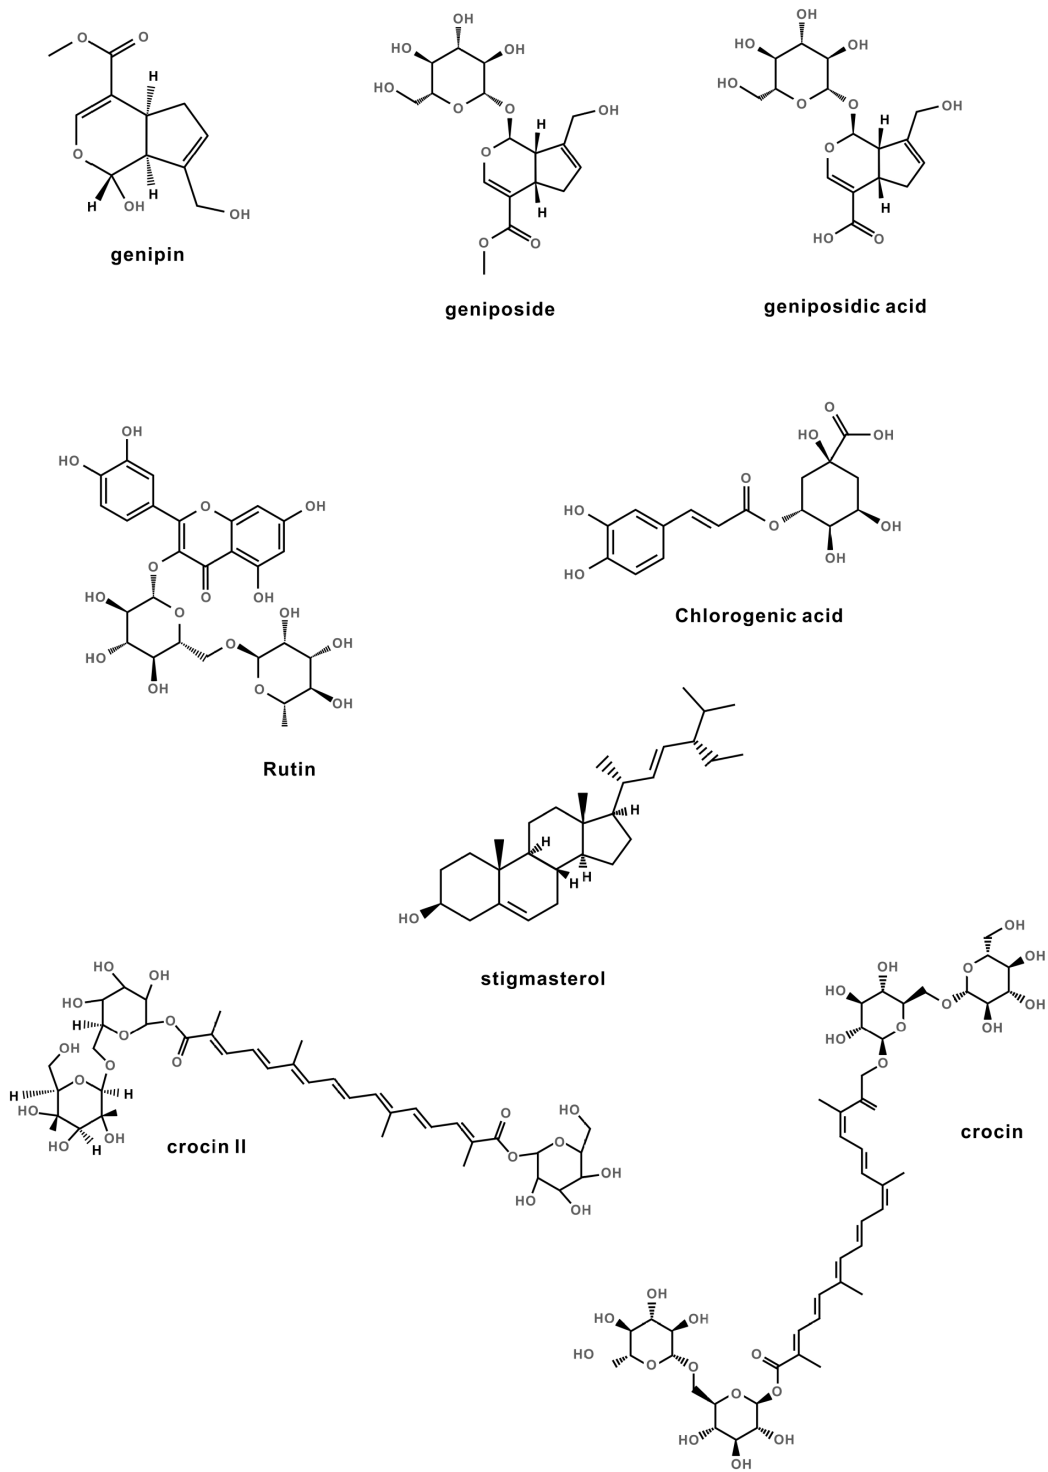

Supplementary Fig. 2. Structures of the compounds identified in 70% ethanolic extract of *Gardenia jasminoides* ( $GJ_{EtOH}$ ).
